# Supplementary material for: Seasonal carbon fluxes from vegetation and soil in a Mediterranean non-tidal salt marsh
Source: Copernicus journal article supplement (doi:10.5194/egusphere-2024-1320), 2024-05-14
Supplement: Supplementary file 1 [file egusphere-2024-1320-supplement.pdf]

## **Seasonal Carbon Fluxes from Vegetation and Soil in a Mediterranean Non-tidal Salt Marsh**

Lorena Carrasco-Barea<sup>1\*</sup>, Dolors Verdaguer<sup>1</sup>, Maria Gispert<sup>2</sup>, Xavier D. Quintana<sup>3</sup>, H el ene Bourhis<sup>1</sup>, and Laura Llorens<sup>1</sup>

<sup>1</sup> Group of Soils and Vegetation in the Mediterranean (SOLIPLANT), Plant Physiology Unit, Department of Environmental Sciences, Faculty of Sciences, University of Girona, Campus Montilivi, 17003 Girona, Spain

<sup>2</sup> Group of Soils and Vegetation in the Mediterranean (SOLIPLANT), Soil Science Unit, Department of Chemical and Agricultural Engineering and Agrifood Technology, University of Girona, Campus Montilivi, 17003 Girona, Spain

<sup>3</sup> GRECO, Institute of Aquatic Ecology, University of Girona, Campus Montilivi, 17003 Girona, Spain

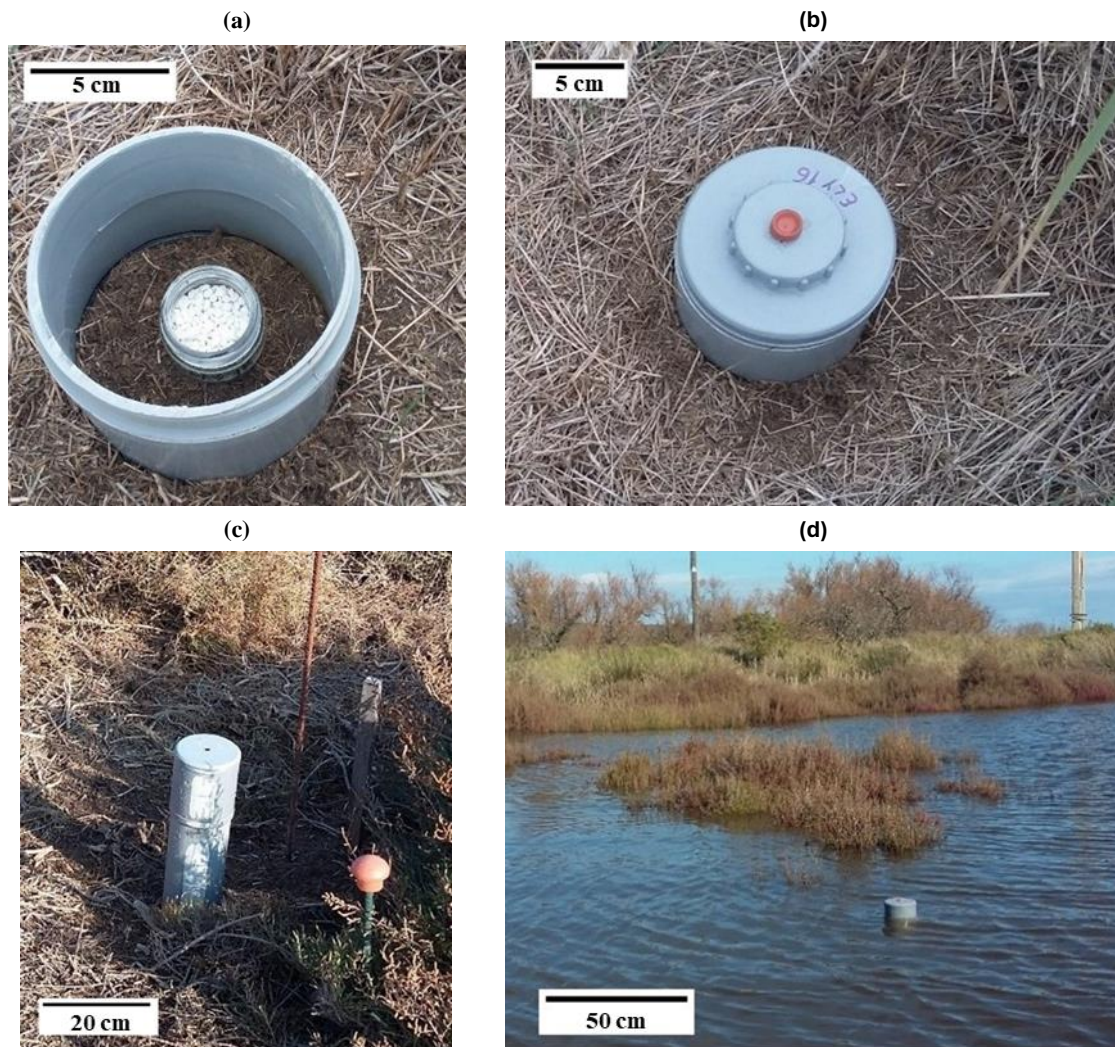

**Figure S1.** Opaque chambers used to take the measurements of net soil CO<sub>2</sub> and CH<sub>4</sub> fluxes under non-flooded (a and b) and flooded (c and d) conditions. When soil was not flooded, soda lime was placed inside the chamber (a) and then it was hermetically closed (b).

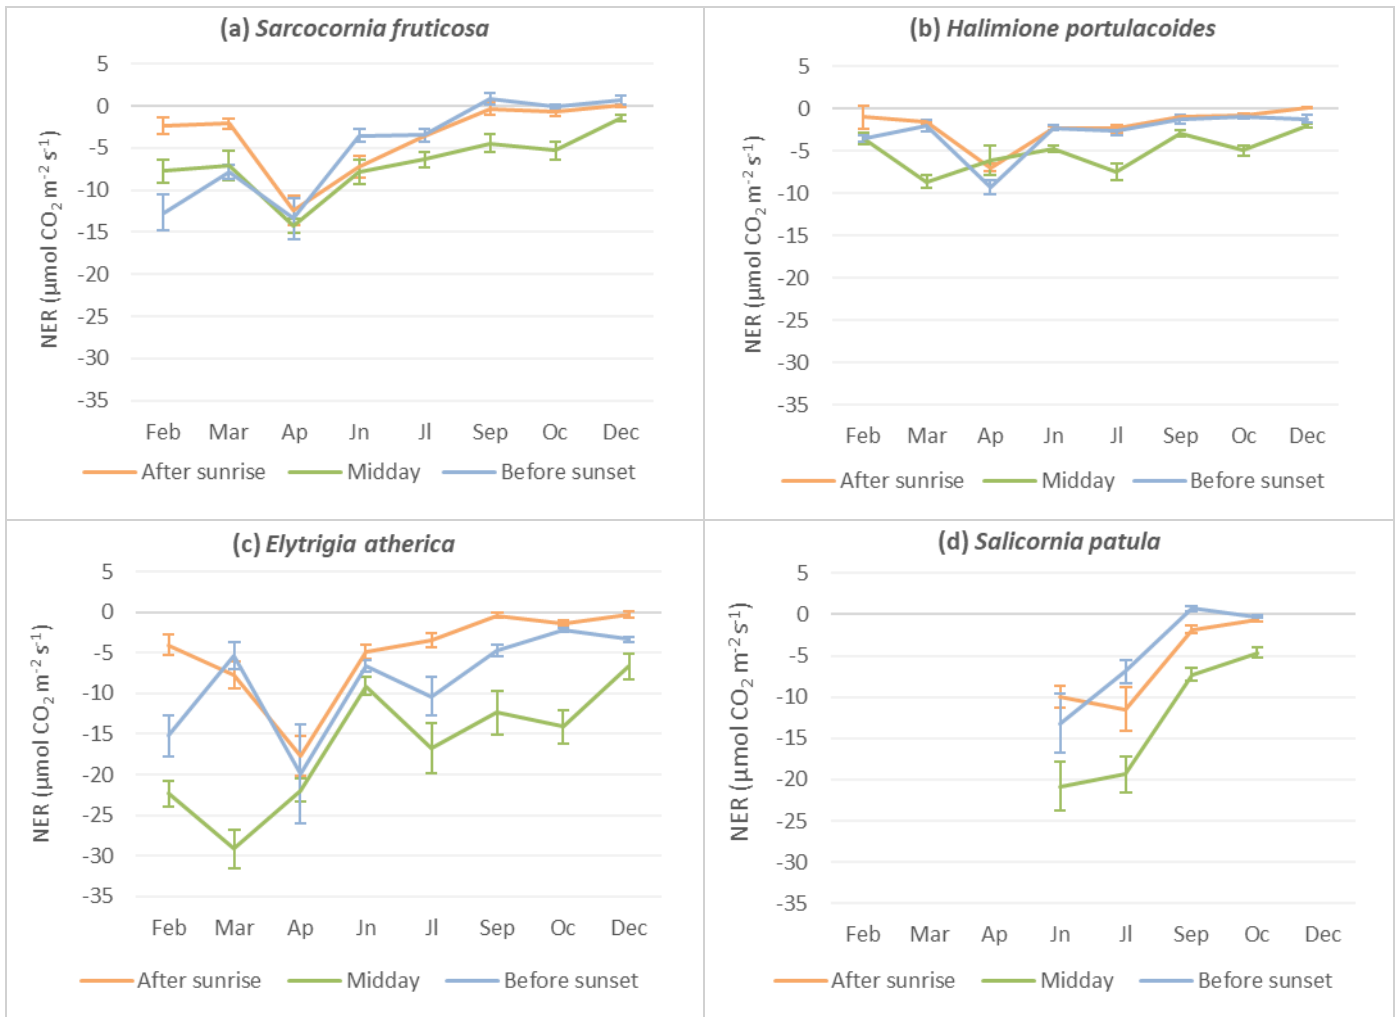

**Figure S2.** Instantaneous net CO<sub>2</sub> exchange rates (NER) at three daily periods (after sunrise, at midday and before sunset) for the green tissues of *S. fruticosa* (a), *H. portulacoides* (b), *E. atherica* (c) and *S. patula* (d). Negative values indicate net photosynthetic activity, while positive values indicate net respiration. Bars represent standard errors (n = 4 after sunrise, before sunset and at night, while n = 6 at midday).

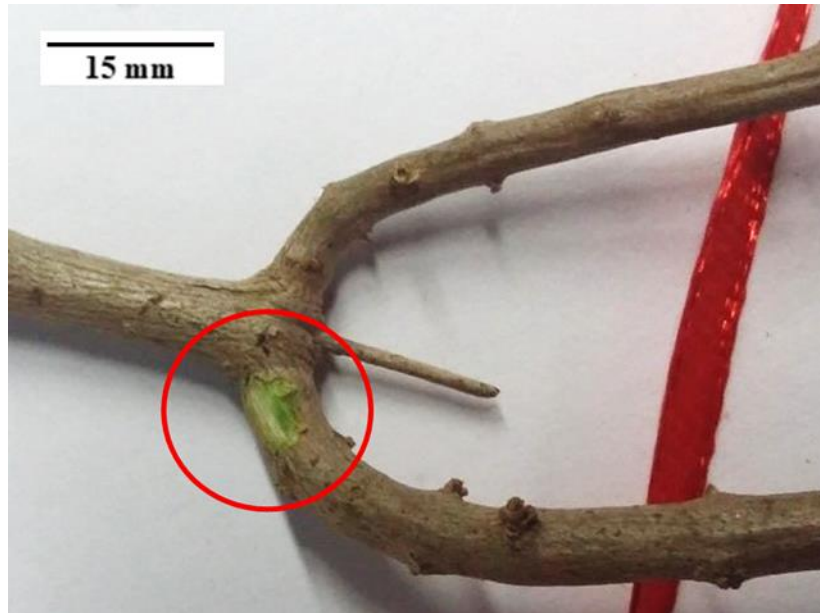

**Figure S3.** Thin woody stems of *S. fruticosa* where the green tissue under the bark can be observed.

**Table S1.** Summary of the samplings performed to determine CO<sub>2</sub> fluxes from green and thin ( $\varnothing \leq 3\text{mm}$ ) woody plant tissues throughout one year (2017). The frequency of samplings per season and the number of plants used per species (n) are shown for the different times of the day when measurements were taken.

| Time of the day | n | Frequency of samplings                                                                                                                                      |                                                                                                     |
|-----------------|---|-------------------------------------------------------------------------------------------------------------------------------------------------------------|-----------------------------------------------------------------------------------------------------|
|                 |   | Green tissues                                                                                                                                               | Thin woody tissues                                                                                  |
| After sunrise   | 4 | Every month and a half approximately (twice/season):<br>9 February, 10-16 March, 19-20 April, 8-13 June, 10-12 July, 4-11 September, 23 October, 6 December | Every three months approximately (once/season):<br>10 March, 15-16 May, 24-28 August, 7-15 November |
| Midday          | 6 |                                                                                                                                                             |                                                                                                     |
| Before sunset   | 4 |                                                                                                                                                             |                                                                                                     |
| Night           | 4 | Every three months approximately (once/season):<br>10 February, 13 June, 28 August, 15 November                                                             |                                                                                                     |

**Table S2.** Summary of the samplings performed to determine soil CO<sub>2</sub> fluxes throughout 2017 indicating the number of flooded and non-flooded plots in every sampling day and the method used in each situation.

| Habitat           | Flood state | Method             | Winter |     | Spring |     | Summer |     | Autumn |     |
|-------------------|-------------|--------------------|--------|-----|--------|-----|--------|-----|--------|-----|
|                   |             |                    | Feb    | Mar | Apr    | Jun | Jul    | Sep | Oct    | Dec |
| Halophilous scrub | Non-flooded | Soda-lime          |        | 5   | 5      | 5   | 5      | 5   | 5      | 5   |
|                   | Flooded     | Gas chromatography | 5      |     |        |     |        |     |        |     |
| Salt meadow       | Non-flooded | Soda-lime          |        | 5   | 5      | 5   | 5      | 5   | 5      | 5   |
|                   | Flooded     | Gas chromatography | 5      |     |        |     |        |     |        |     |
| Glasswort sward   | Non-flooded | Soda-lime          |        | 2   | 5      | 5   | 5      | 5   | 5      | 2   |
|                   | Flooded     | Gas chromatography | 5      | 3   |        |     |        |     |        | 3   |
